# Supplementary material for: An engineered Cas12i nuclease that is an efficient genome editing tool in animals and plants
Source: PubMed Central journal article supplement — Innovation (Camb). 2024 Jan 8;5(2):100564. doi: 10.1016/j.xinn.2024.100564 (PMC10878114; doi:10.1016/j.xinn.2024.100564), 2024-01-08
Supplement: mmc1.pdf [file mmc1.pdf]

**The Innovation, Volume 5**

## **Supplemental Information**

### **An engineered Cas12i nuclease that is an efficient genome editing tool in animals and plants**

**Zhiqiang Duan, Yafeng Liang, Jialei Sun, Hongjin Zheng, Tong Lin, Pengyu Luo, Mengge Wang, Ruiheng Liu, Ying Chen, Shuhua Guo, Nannan Jia, Hongtao Xie, Meili Zhou, Minghui Xia, Kaijun Zhao, Shuhui Wang, Na Liu, Yongling Jia, Wei Si, Qitong Chen, Yechun Hong, Ruilin Tian, and Jian-Kang Zhu**

# Supplemental Figure 1

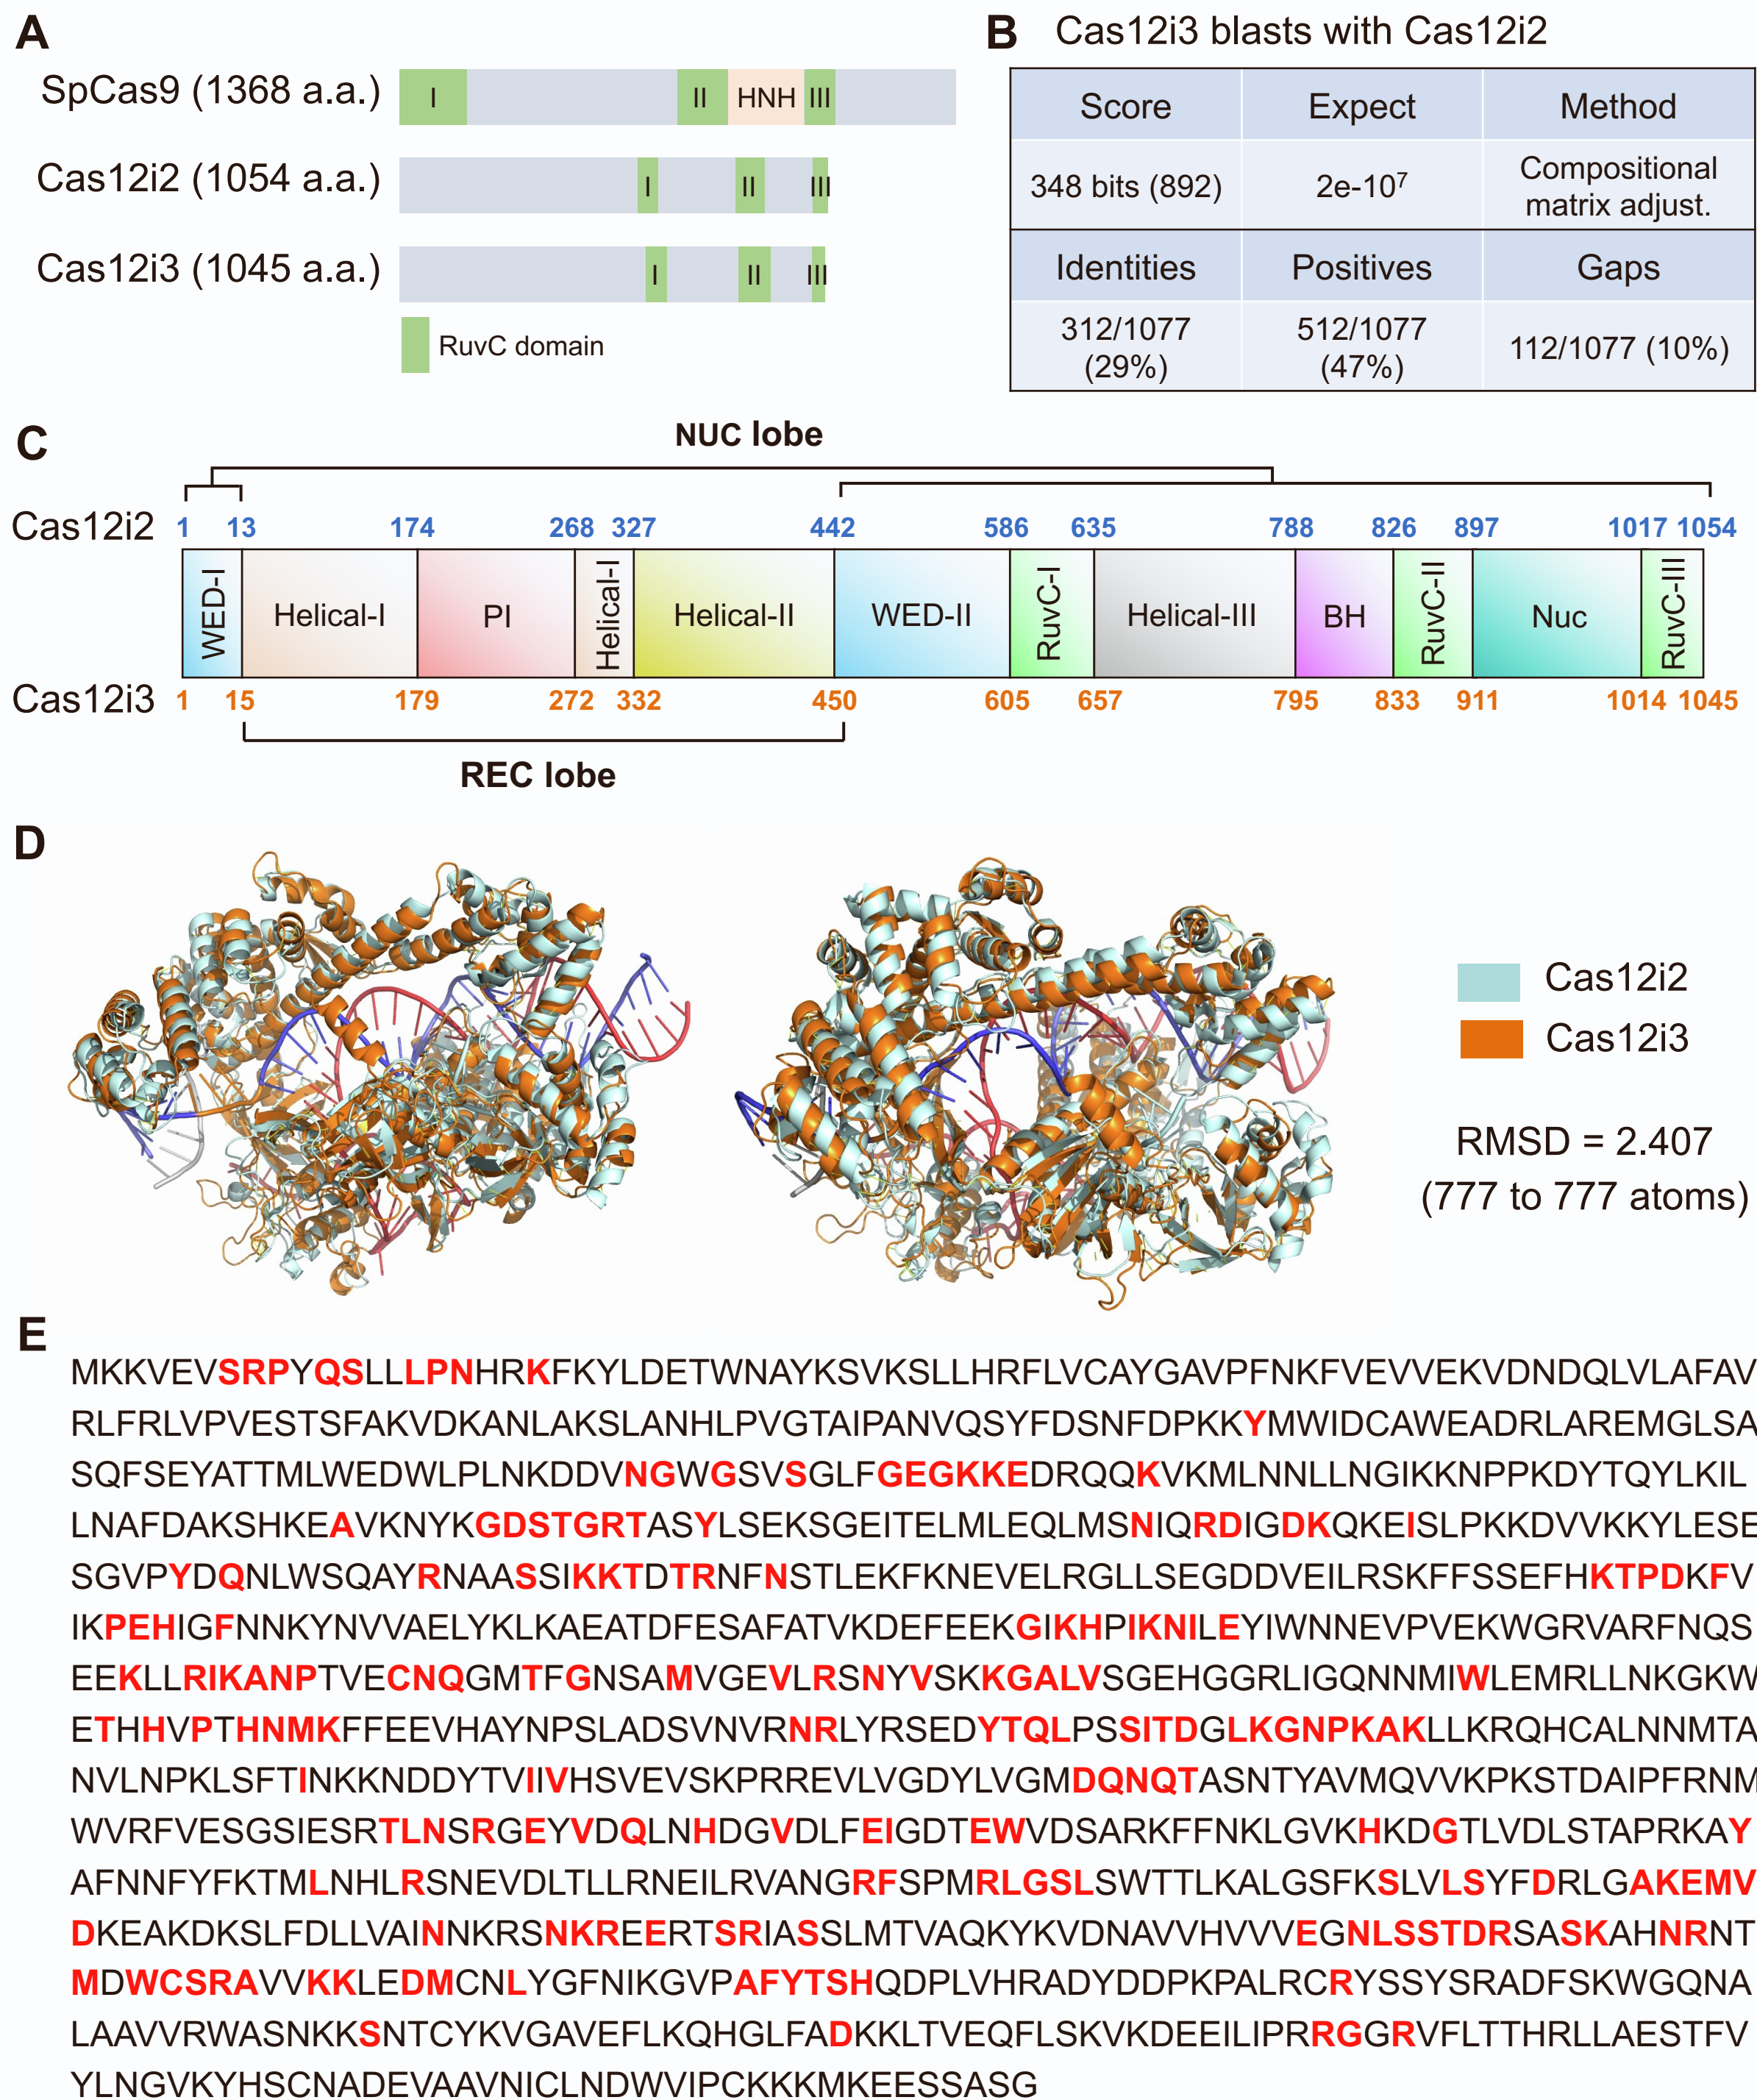

## Supplemental Figure 1. The predicted protein structure of Cas12i3 is similar to that of Cas12i2.

(A) Protein domain organization of SpCas9, Cas12i2 and Cas12i3. Protein lengths are indicated.

(B) Protein blast result for Cas12i3 and Cas12i2.

(C) Detailed domain organizations of Cas12i3 and Cas12i2.

(D) The structural similarity between Cas12i3 (orange) and Cas12i2 (light blue) as predicted by Alpha-fold.

(E) The protein sequence of Cas12i3 and the predicted residues (highlighted by red, bold) interacting with crRNA or DNA.

## Supplemental Figure 2

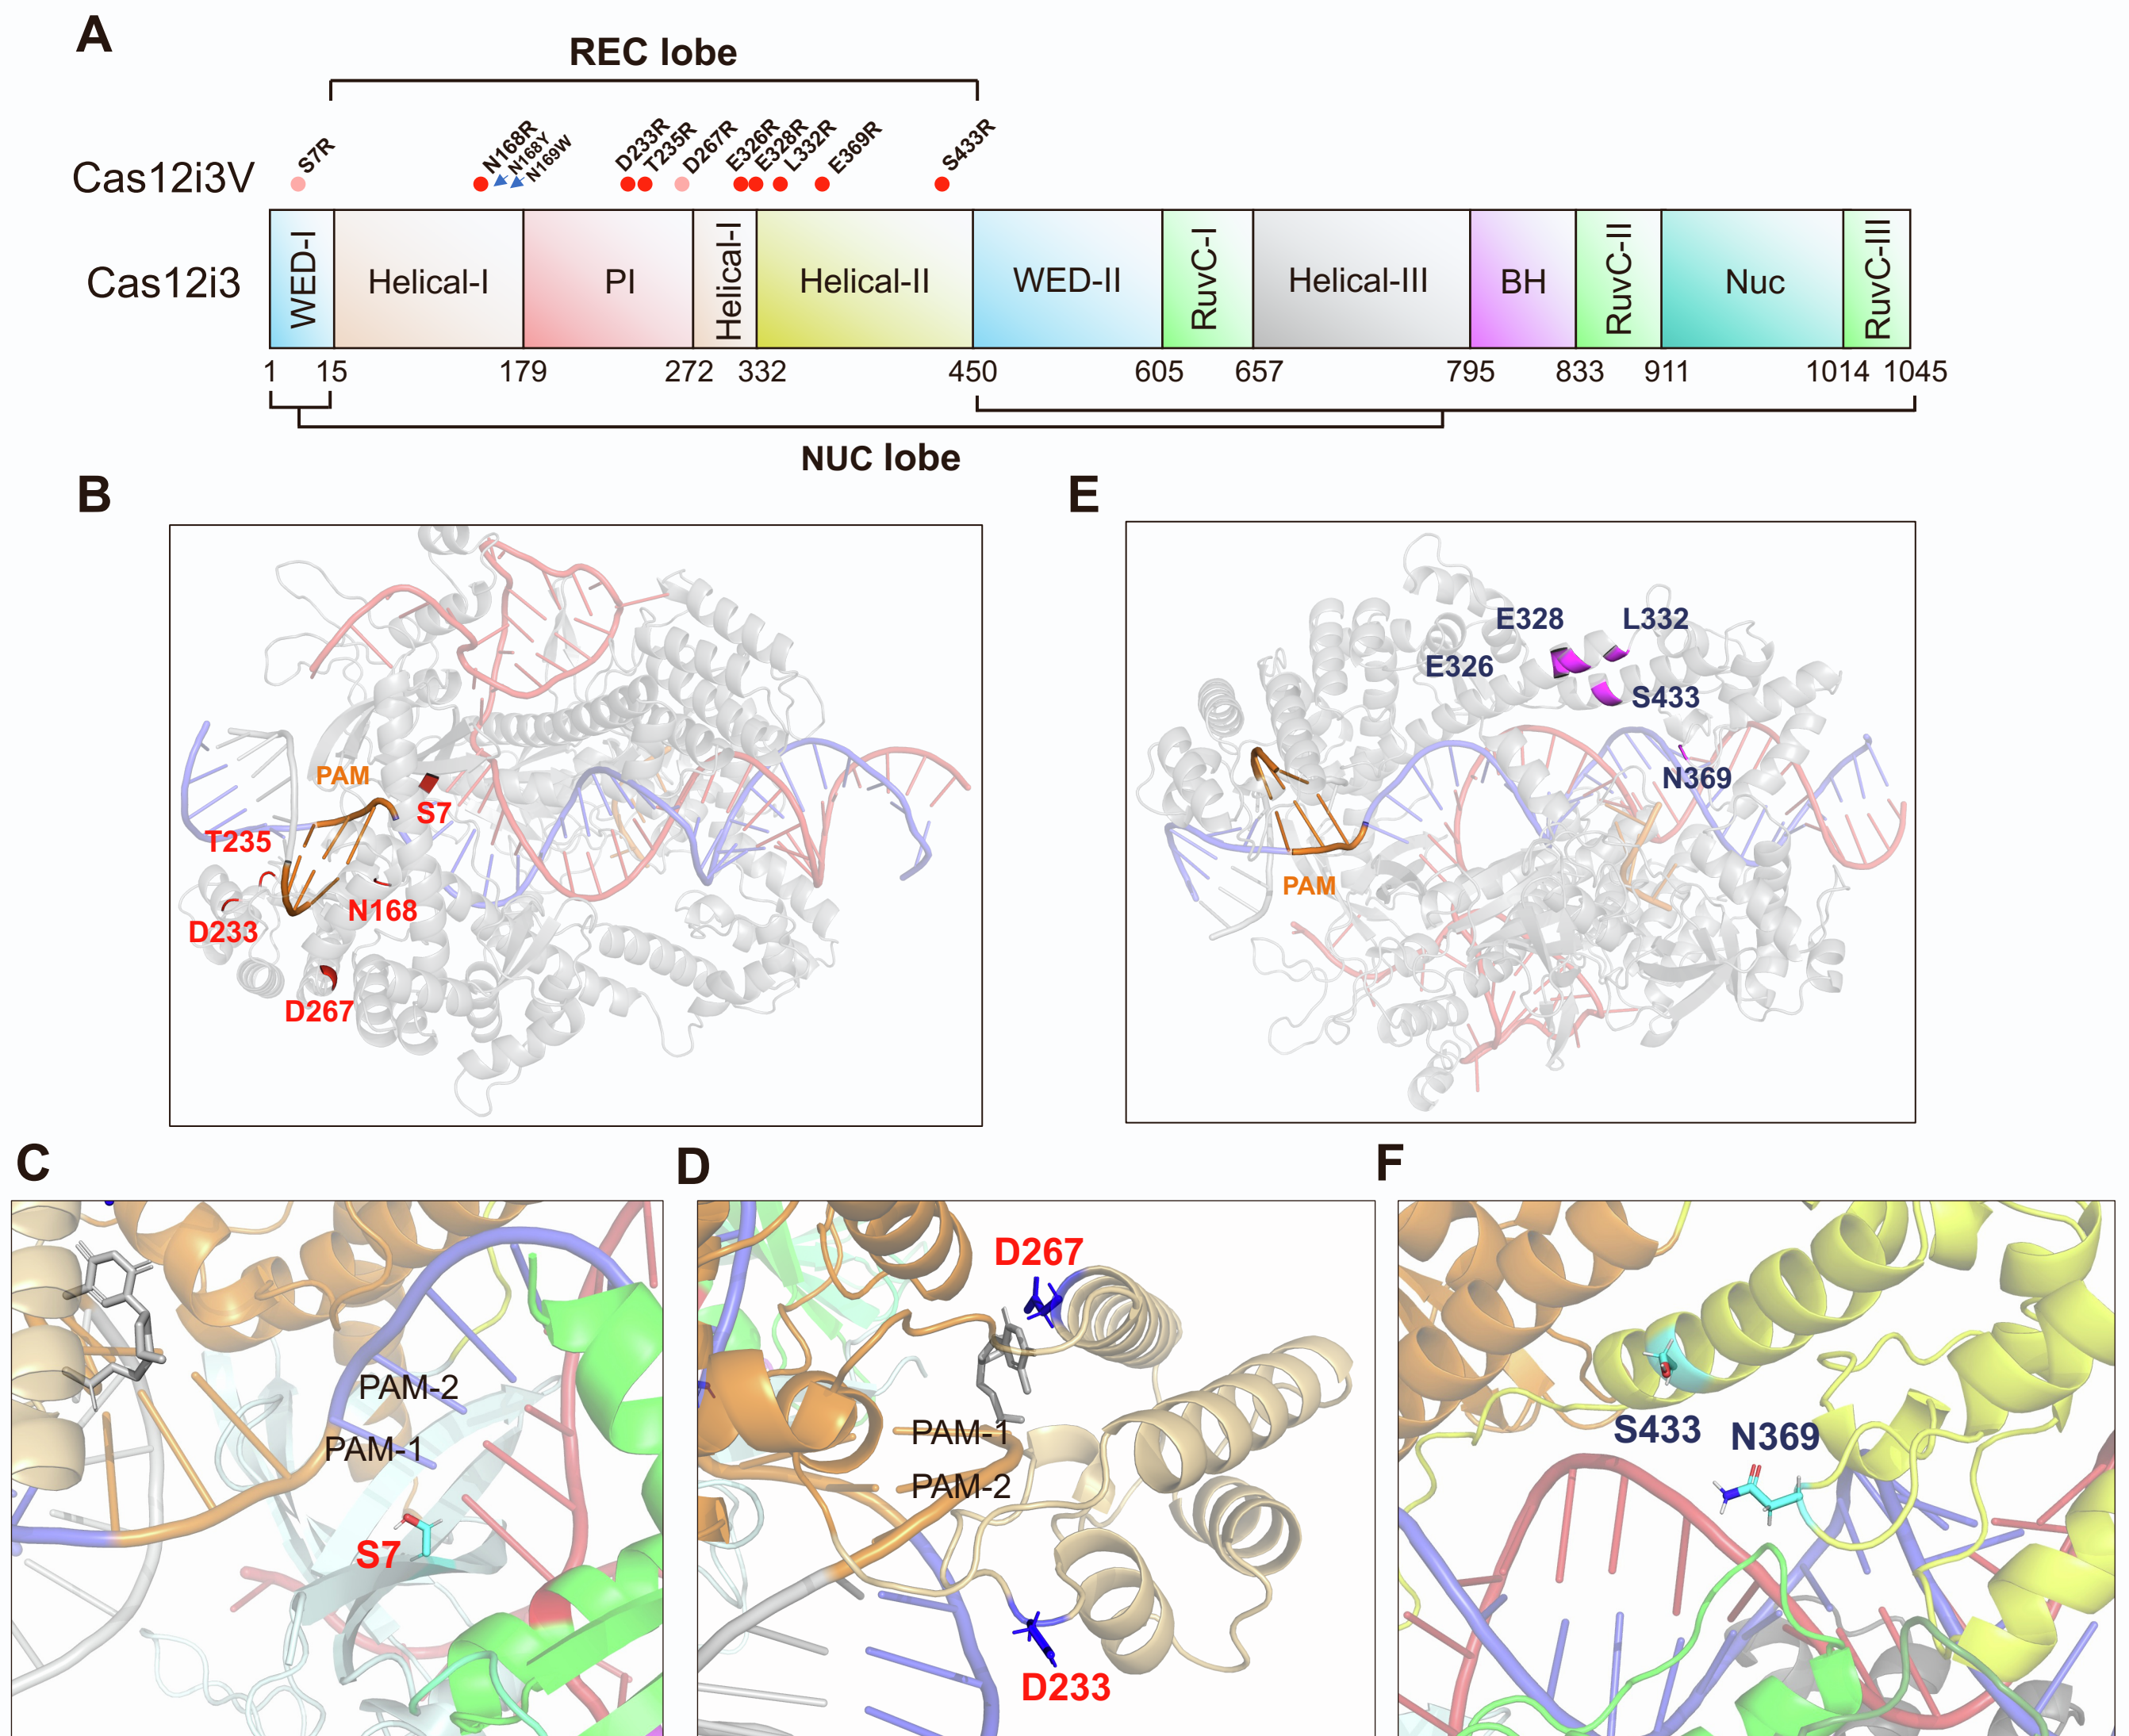

### Supplemental Figure 2. Cas12i3 variants selected for combinatorial engineering.

(A) The position information of variants with increased editing activity.

(B - D) Amino acids chosen for enhancing interaction between Cas-SF01 and PAM, indicated in red.

(E, F) Amino acids chosen for promoting interaction with DNA, indicated in blue.

## Supplemental Figure 3

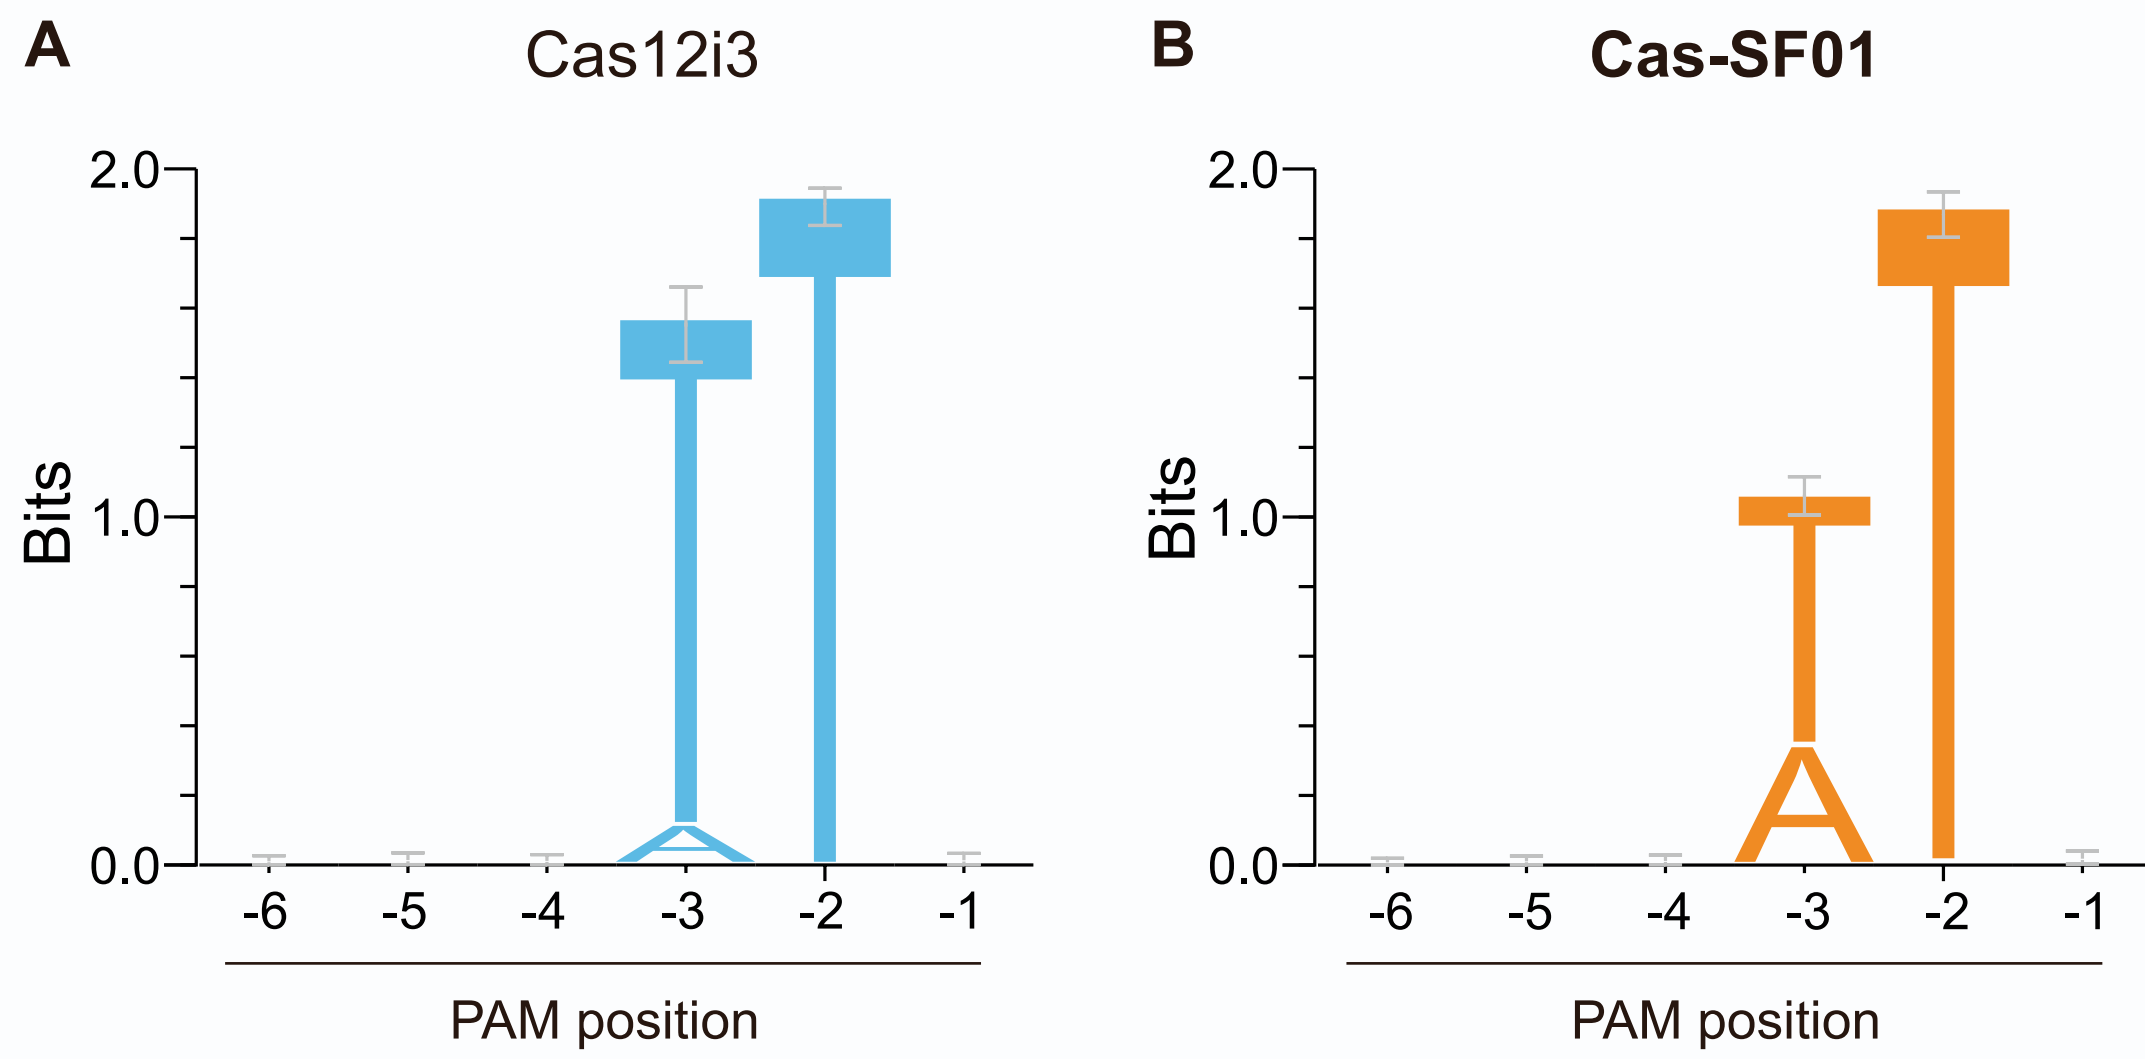

**Supplemental Figure 3. WebLogo diagrams of Cas12i3 and Cas-SF01 were generated based on deep sequencing data.**

## Supplemental Figure 4

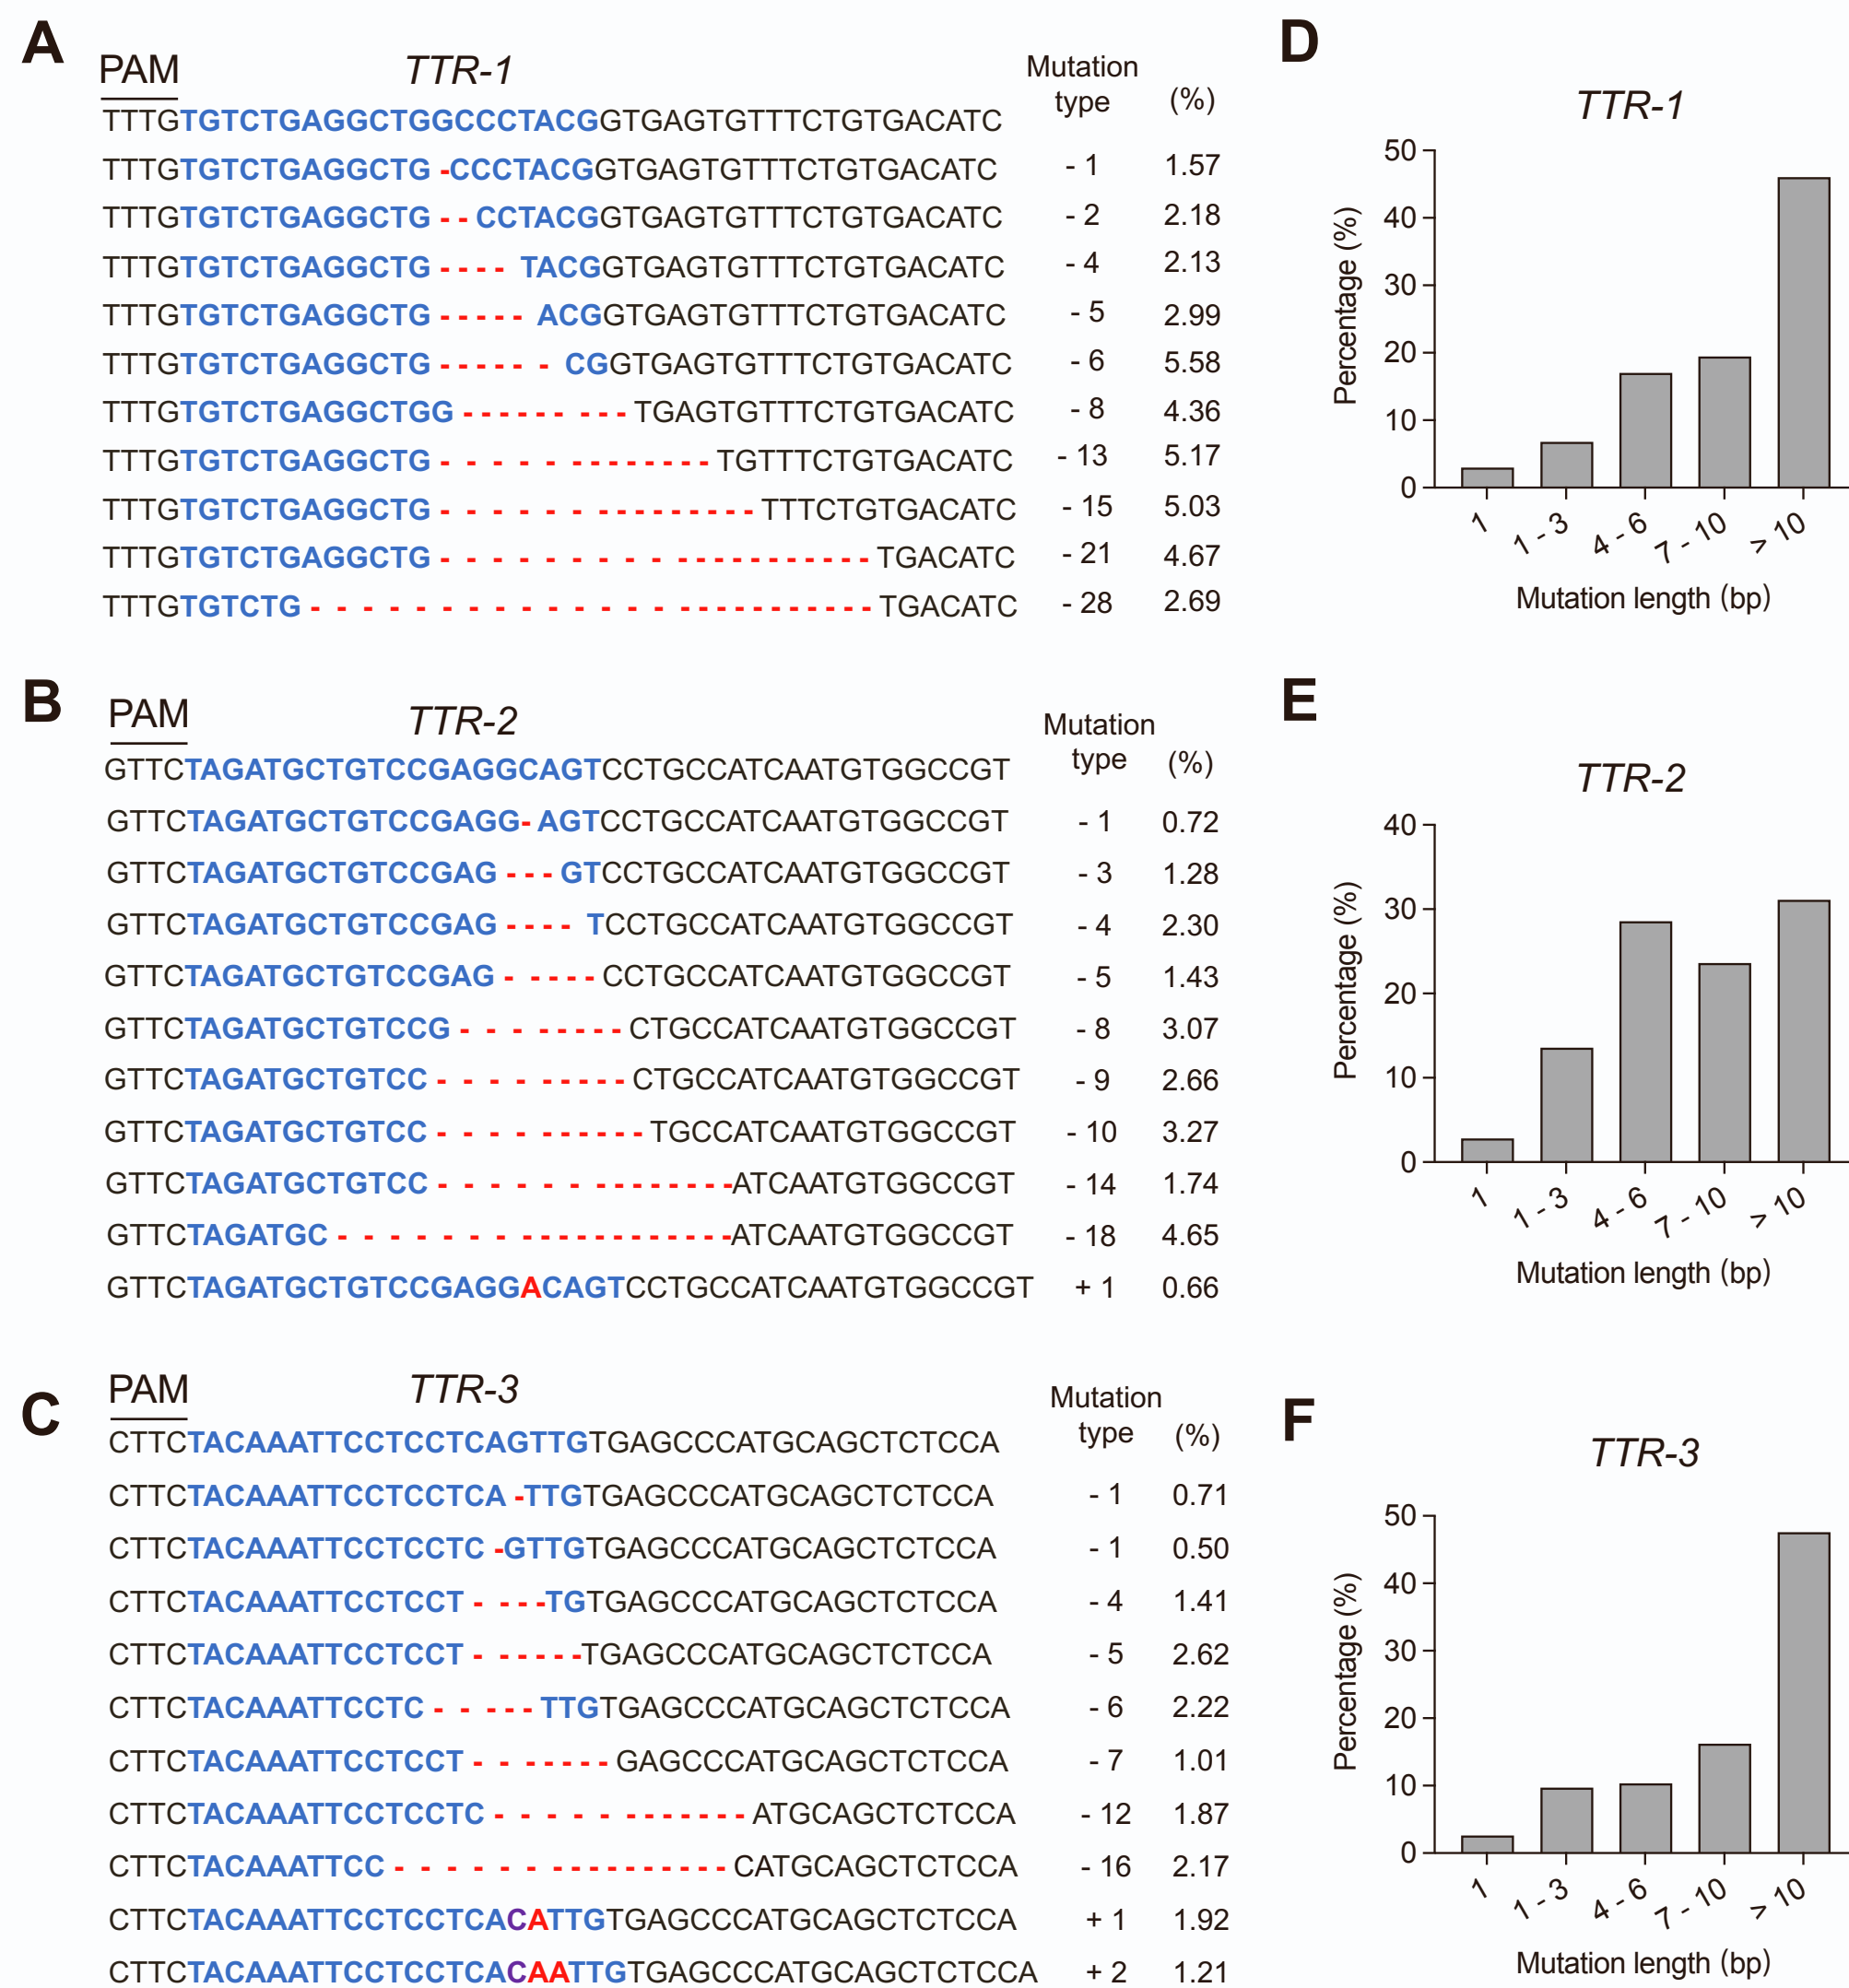

### Supplemental Figure 4. The distribution of different types of mutations generated by Cas-SF01 at the *TTR* locus.

The mutant alleles at three *TTR* sites, *TTR-1* to *TTR-3* (A–C), generated by Cas-SF01. The percentages of various mutation lengths are shown in (D–F).

## Supplemental Figure 5

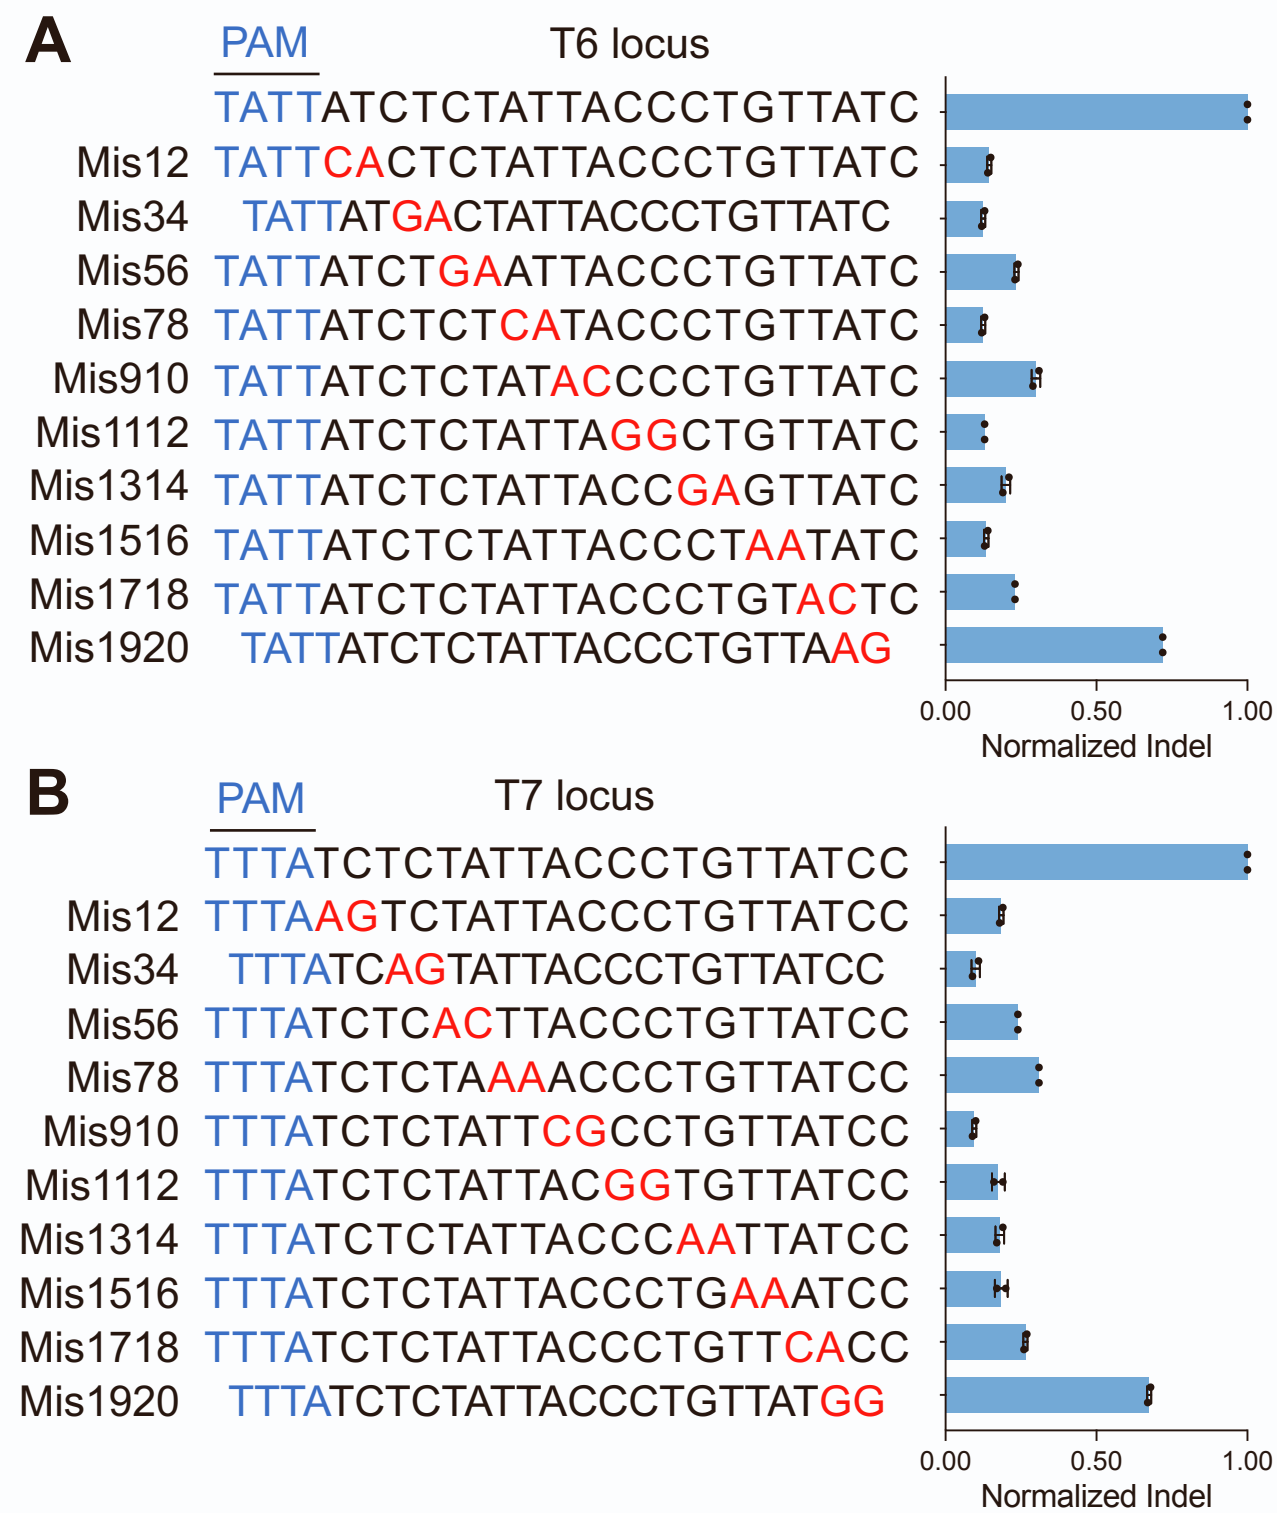

### Supplemental Figure 5. Mismatch tolerance of Cas-SF01 at T6 and T7 sites.

(A, B) The mismatch tolerance of Cas-SF01 was examined by designing dinucleotide mutations at T6 (A) and T7 (B) target sites, and then the EGFP fluorescence was determined.

## Supplemental Figure 6

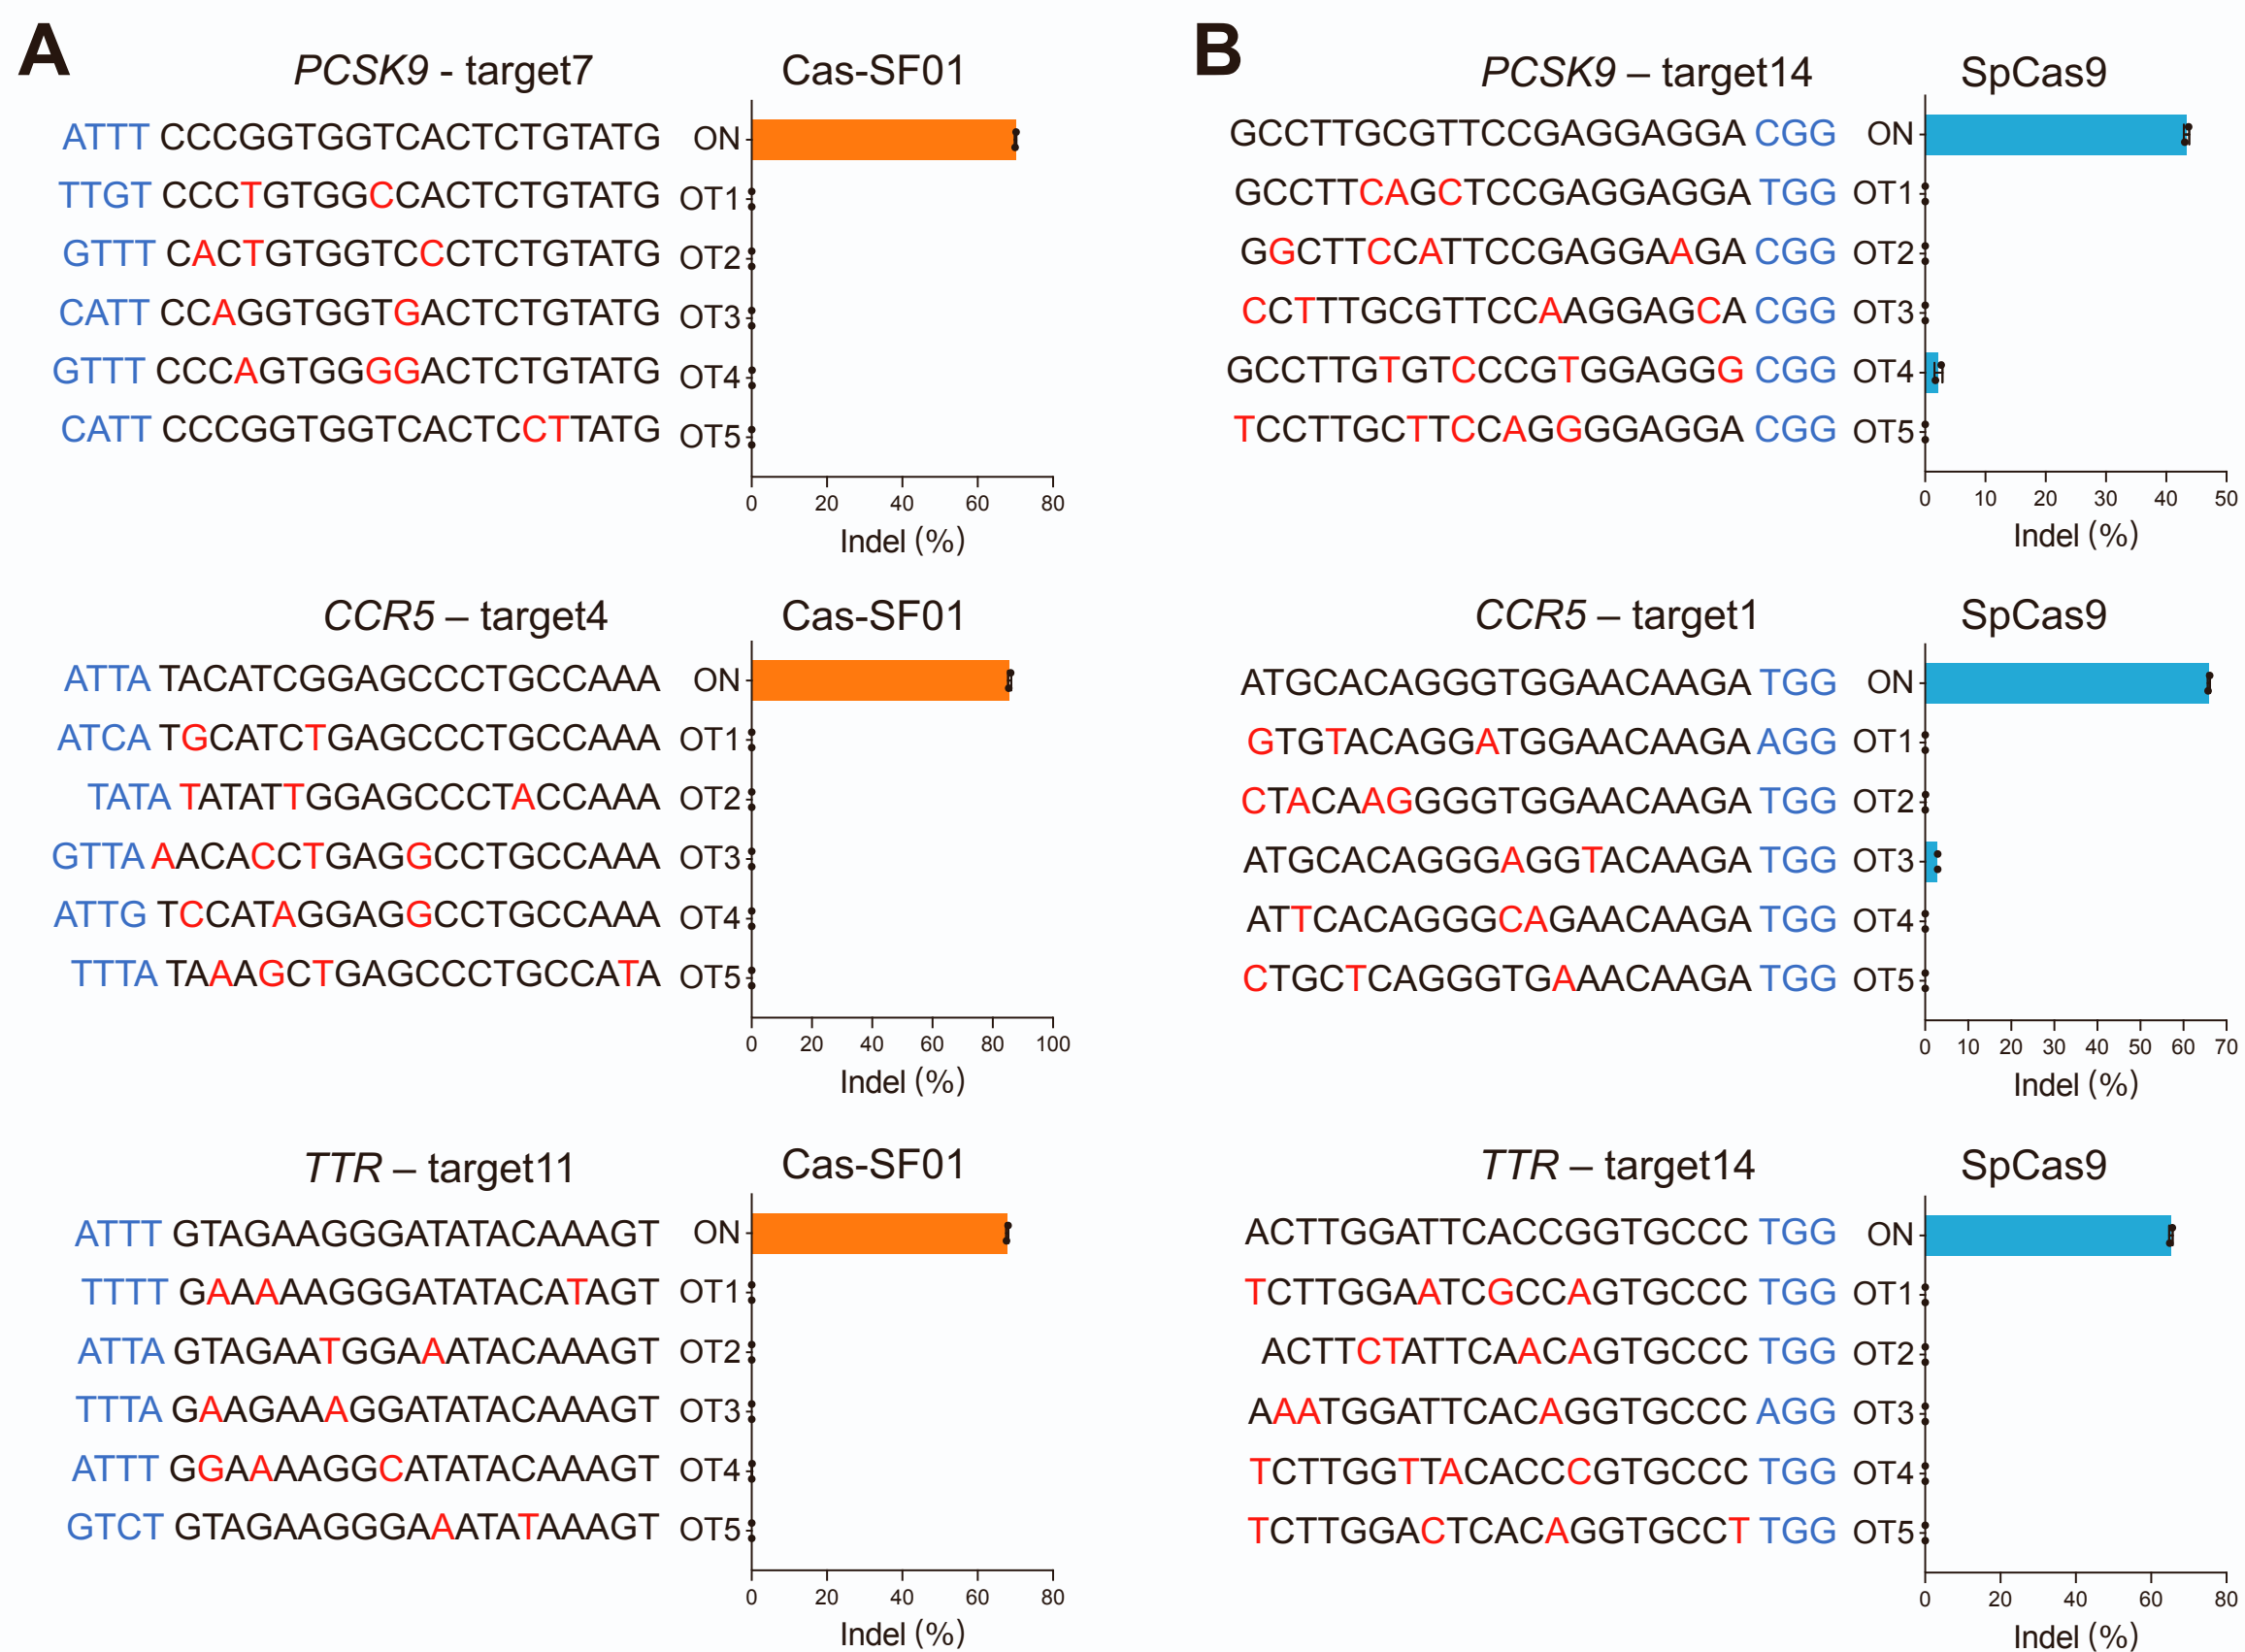

**Supplemental Figure 6. Targeted deep sequencing showed the high specificity of Cas-SF01 in mammalian cells.**

(A, B) The editing efficiency of Cas-SF01 (A) and SpCas9 (B) at three different target sites (ON) of *PCSK9*, *CCR5* and *TTR* and five *in silico* predicted off-target sites (OT).

## Supplemental Figure 7

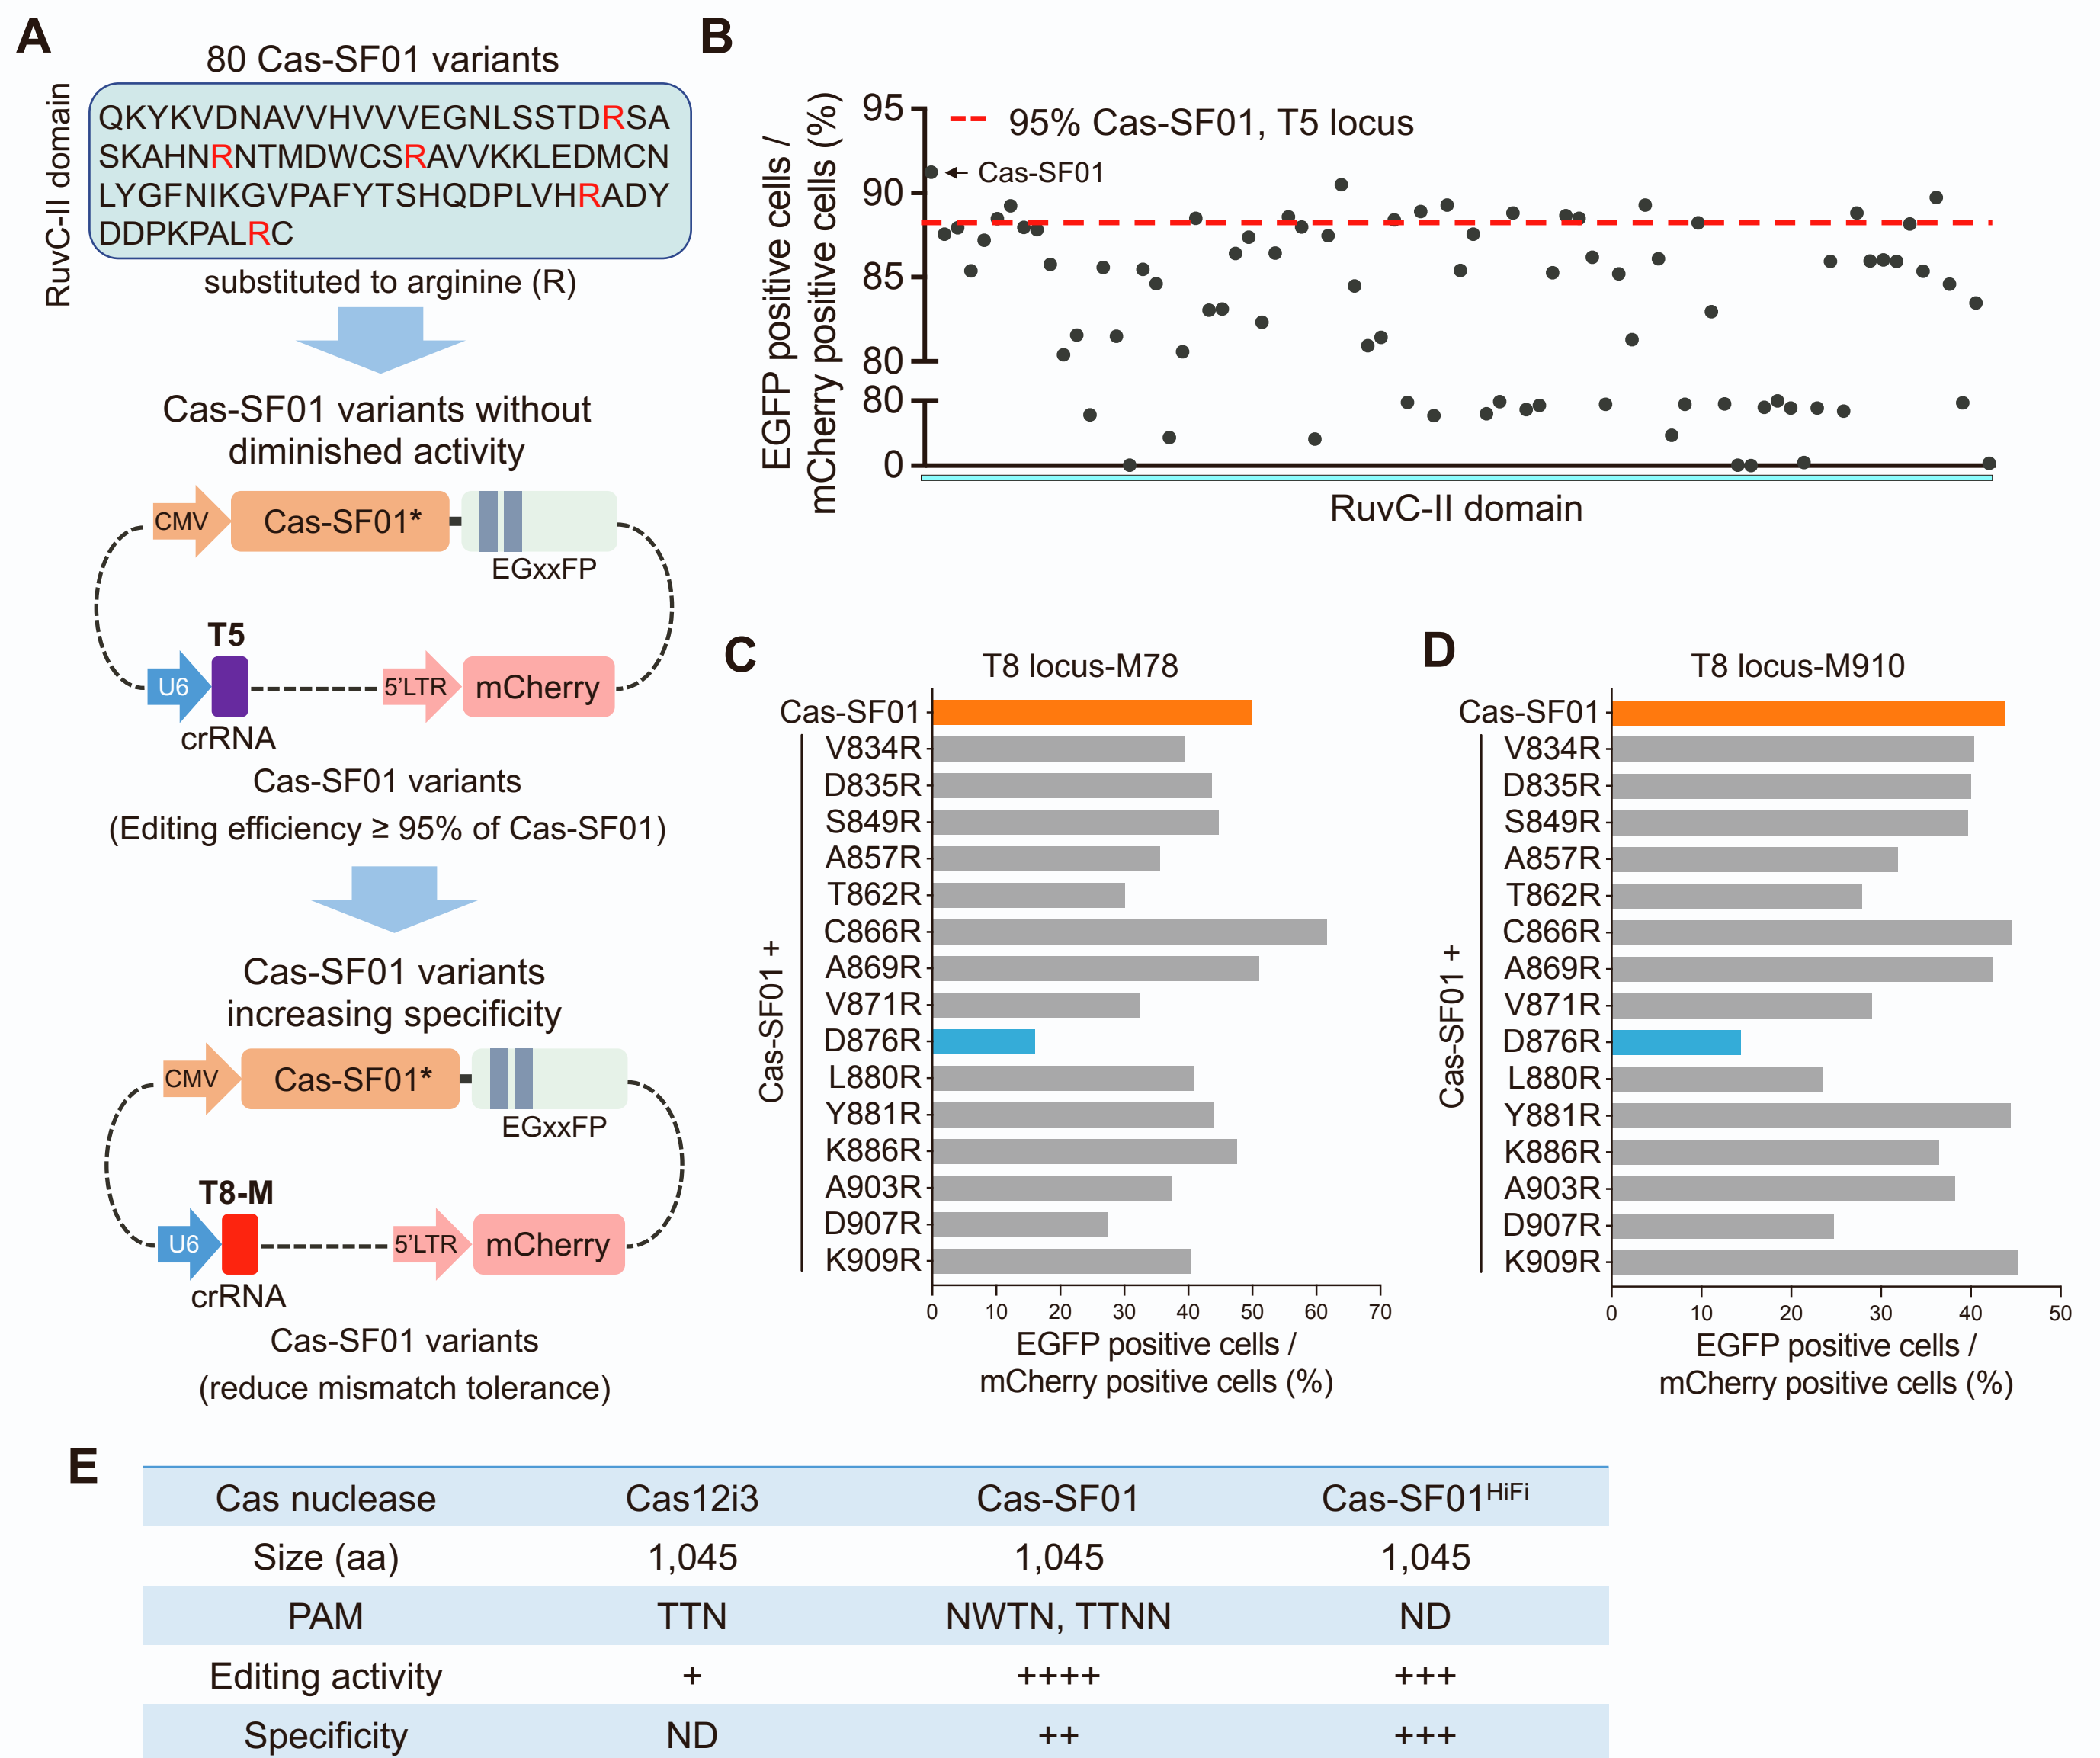

### Supplemental Figure 7. Screening of variants of Cas-SF01 for increased specificity.

(A) Strategy for identifying Cas-SF01 variants with reduced mismatch tolerance. A Cas-SF01 variant pool was generated by individually mutating the amino acid residues in RuvC-II to arginine. Variants with similar editing activity as Cas-SF01 at the T5 locus of the EGFP-reporter system were selected, and finally, their mismatch tolerance was examined using T8-M78 and T8-M910 crRNA.

(B) The editing efficiency of a total of 80 Cas-SF01 variants at the T5 locus was determined using a reporter system. The red dotted line represents 95% editing efficiency of Cas-SF01.

(C, D) Screening for single mutations reducing the mismatch tolerance of Cas-SF01. A total of sixteen variants with similar editing activity were chosen to analyze their mismatch tolerance using T8 locus-M78 (C) and -M910 (D). Note that the D876R variant reduced the mismatch tolerance the most.

(E) The comparison of Cas12i3, Cas-SF01 and Cas-SF01<sup>HiFi</sup>. ND, not determined.



## Supplemental Figure 8

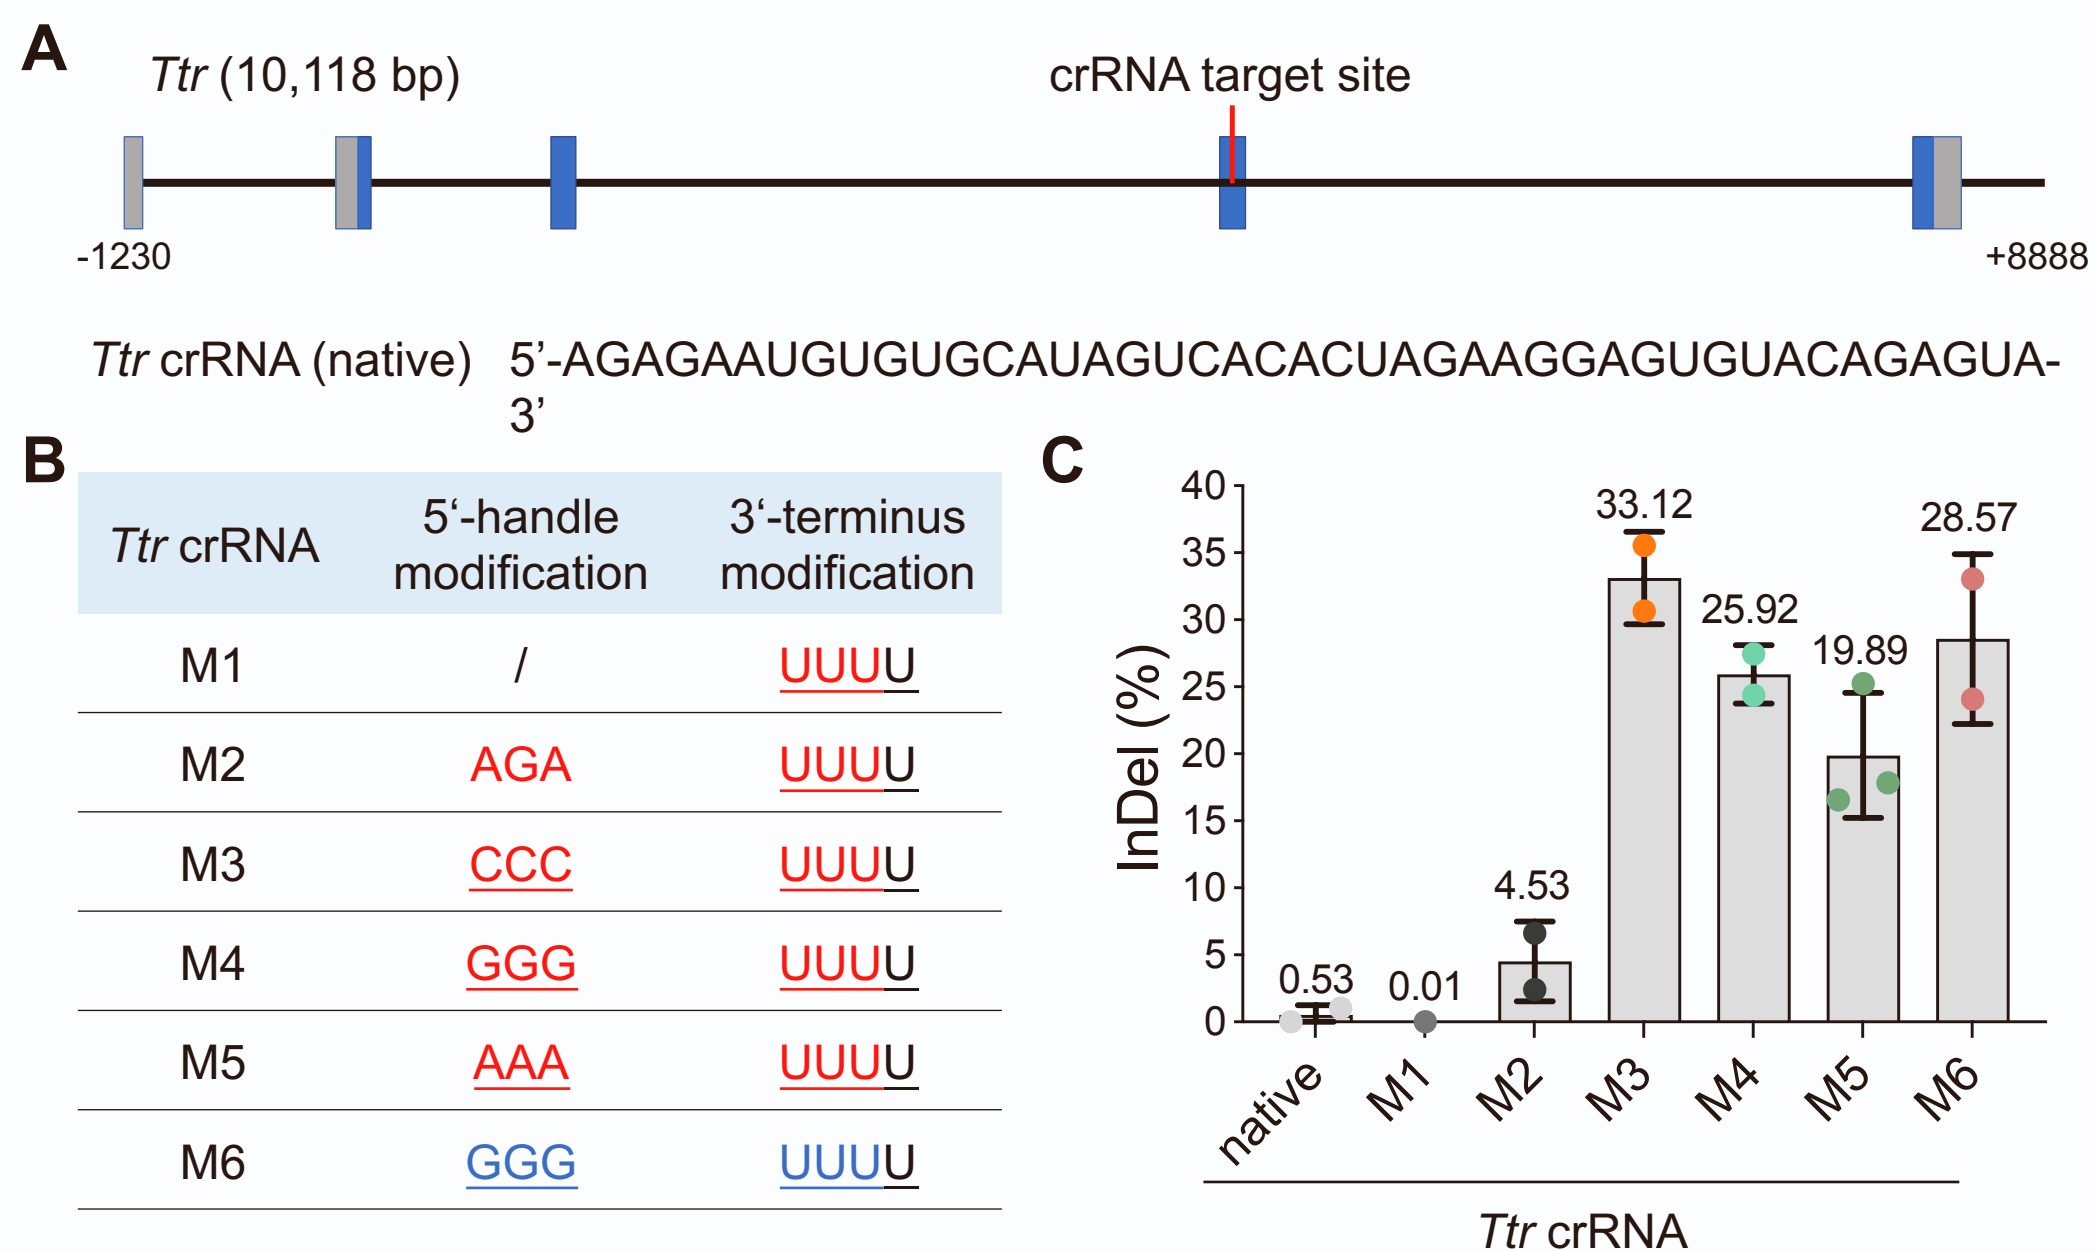

### Supplemental Figure 8. Analysis of *in vivo* editing activity of Cas-SF01 at the *Ttr* locus using different chemically modified crRNAs.

(A) Schematics of *Ttr* gene and sequence of native *Ttr* crRNA.

(B) Six chemically synthesized *Ttr* crRNAs with 5'-handle and/or 3'-terminus modifications. Sequence extension was underlined. Phosphorothioate modification was shown in red, and phosphorothioate combined with 2'-*O*-methyl modifications were shown in blue.

(C) Determination of indel activity of Cas-SF01 with native and six modified crRNAs via LNP delivery in C57 mice.

## Supplemental Figure 9

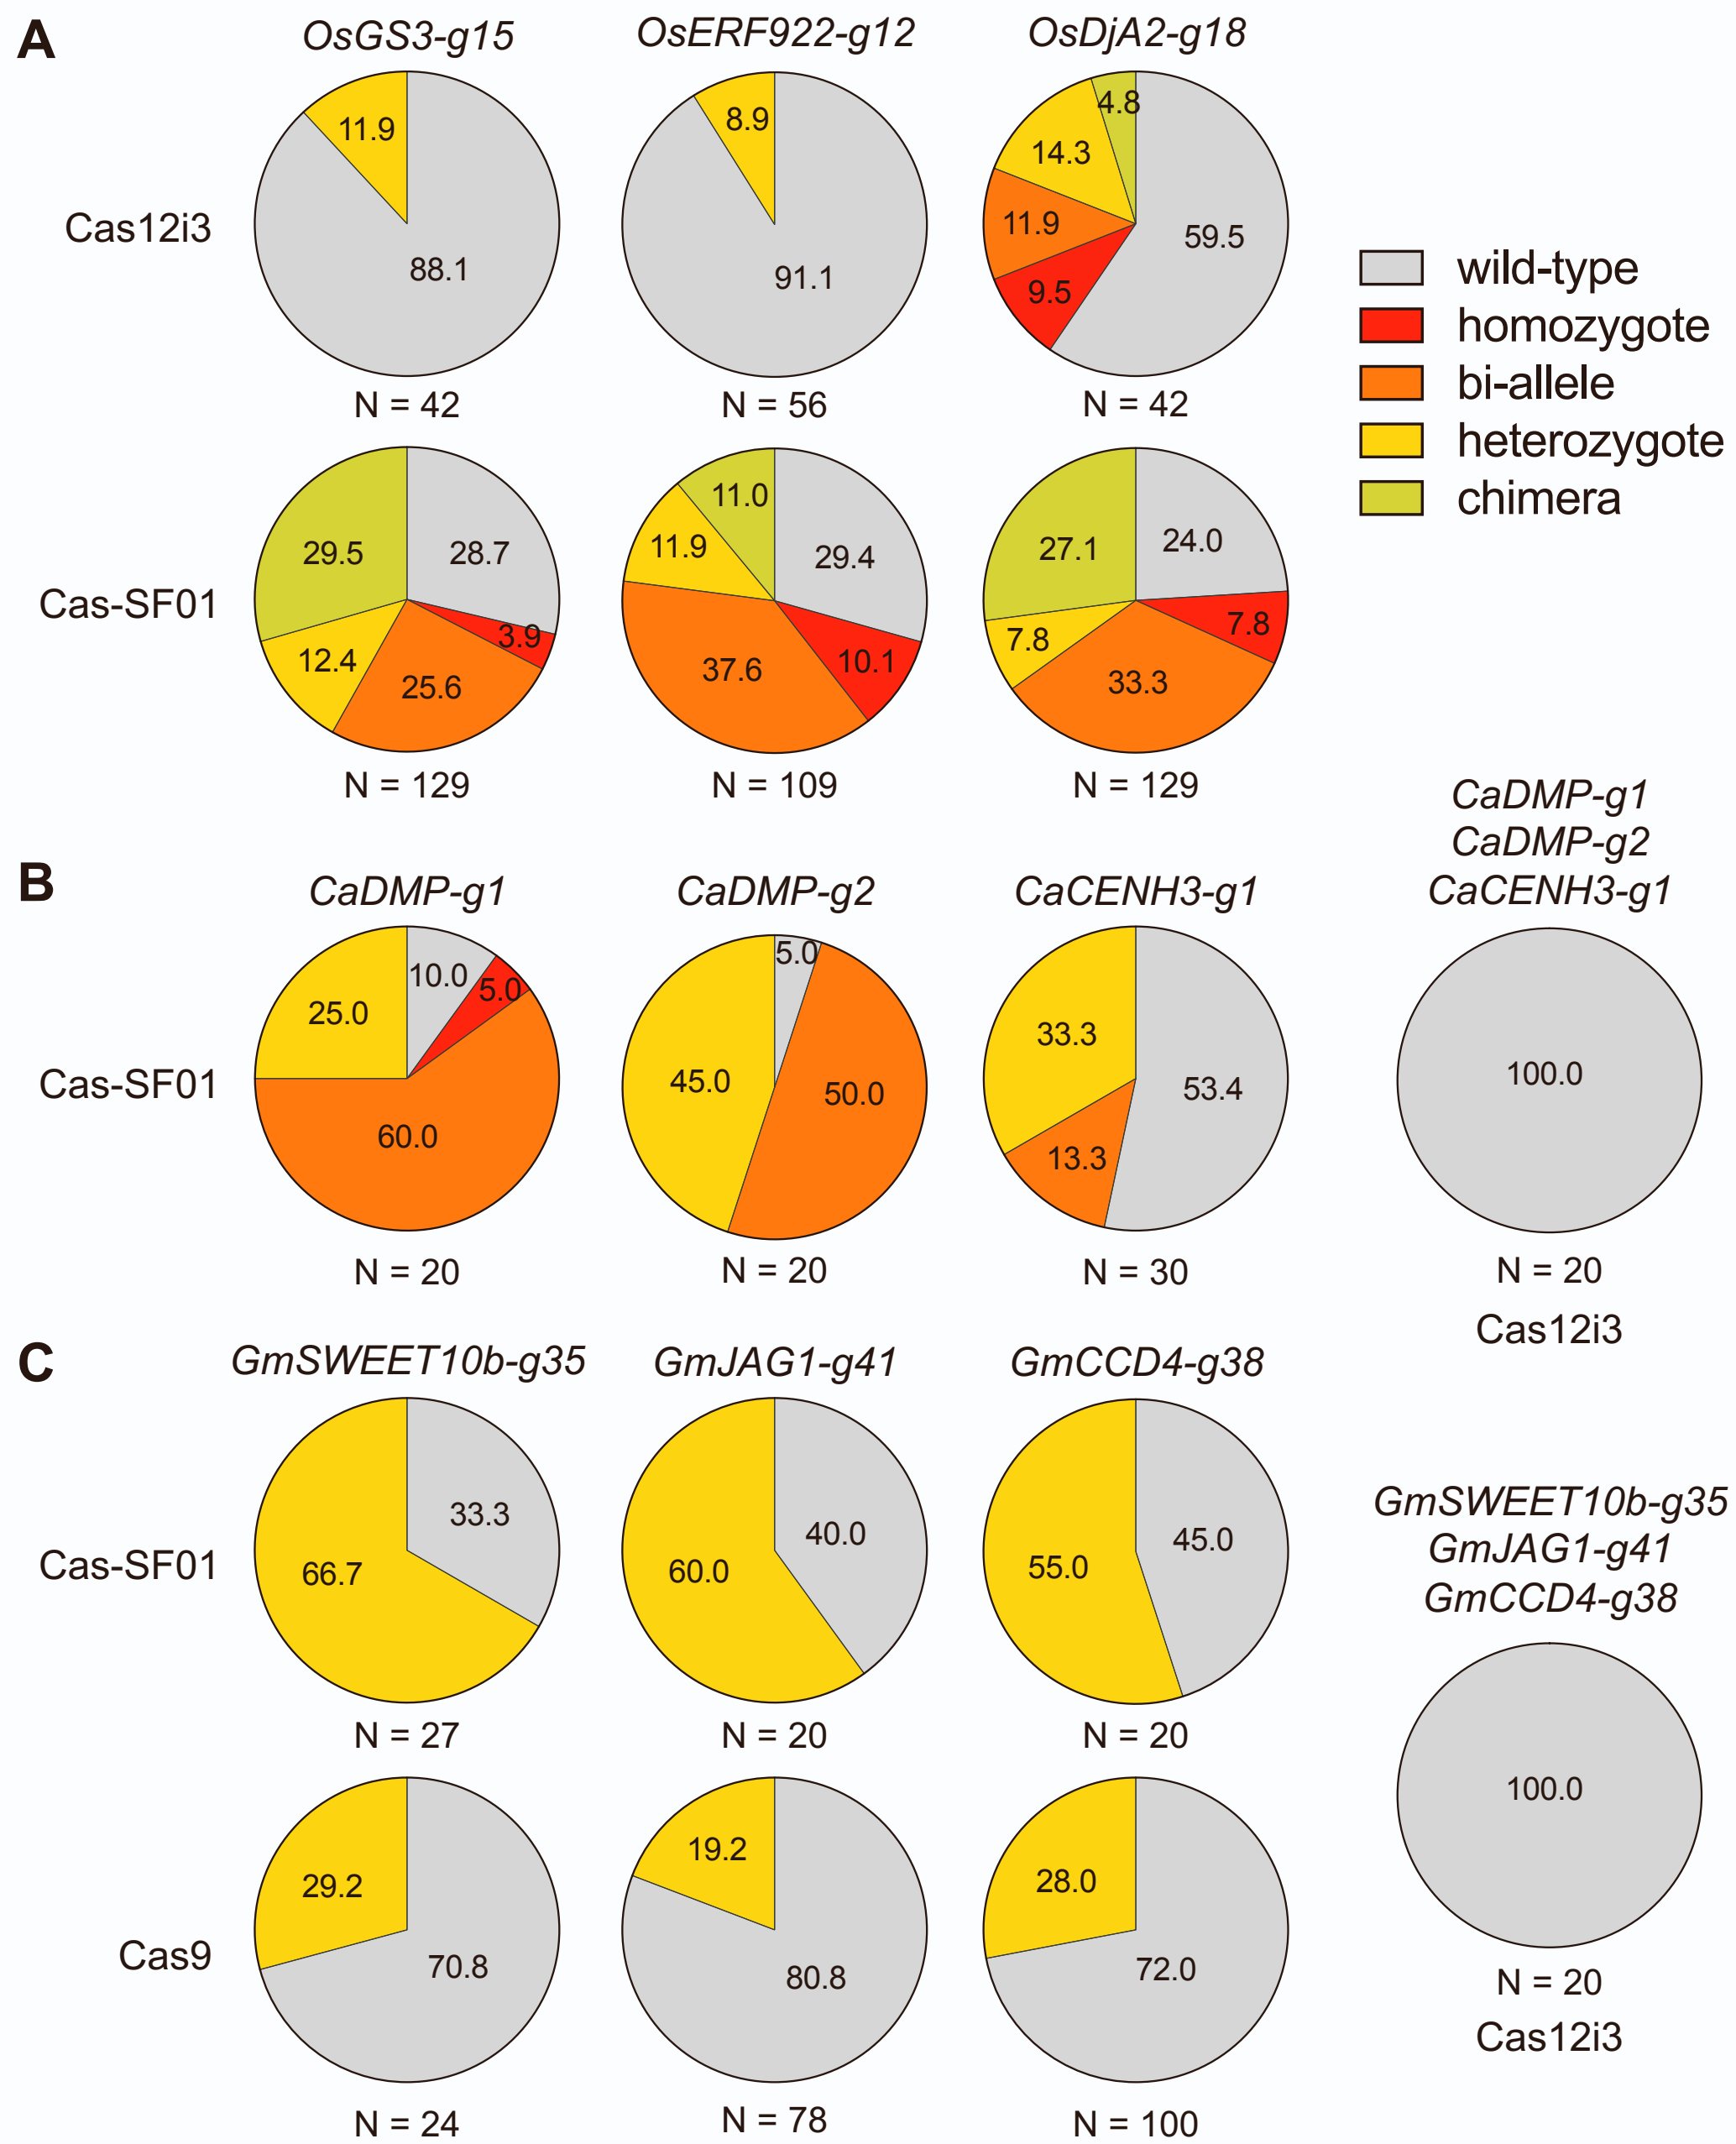

**Supplemental Figure 9. Analysis of genotypes of E0 generation plantlets of rice, and hairy roots of pepper and soybean.**

(A–C) Distribution of the genotypes from E0 plantlets edited at the *OsGS3*, *OsERF922* and *OsDjA2* sites in rice (A), hairy roots edited at *CaDMP* and *CaCENH3* sites in pepper (B), and hairy roots edited at *GmSWEET10b*, *GmJAG1* and *GmCCD4* in soybean (C).
